# Supplementary material for: COVID-19 Due to Wild-Type SARS-CoV-2 More Prevalent in Adolescents and Youth than in Older Adults Based on 19 US States in Fall 2020 Prior to Vaccine Availability
Source: bioRxiv or medRxiv preprint supplement (doi:10.1101/2021.07.06.21260112), 2021-07-08
Supplement: Supplementary file [file media-1.pdf]

Appendix S1, Supplemental material for the manuscript:

“COVID-19 Due to Wild-Type SARS-CoV-2 More Prevalent in Adolescents and Youth than in Older Adults Based on 19 US States in Fall 2020 Prior to Vaccine Availability”

by B. Romain, M. Schneiderman, A. Geliebter

### **Methodological Details**

This supplementary material is provided by the authors to give readers additional source information about the data used in this study.

#### **S1.1. Case Data by State Websites:**

(i) Alaska: <https://experience.arcgis.com/experience/2d19dc2b5c7e4b399ff6495a8950493d/>

[Retrieved Nov. 1, 2020]

(ii) Colorado: <https://covid19.colorado.gov/data> [Retrieved Oct. 23, 2020]

(iii) Michigan: <https://www.mistartmap.info/compare/age-group> [Retrieved Nov. 18, 2020]

(iv) Montana: <https://dphhs.mt.gov/publichealth/cdepi/diseases/coronavirusmt/demographics>

[Retrieved Oct. 24, 2020]

(v) Nevada: <https://nvhealthresponse.nv.gov> [Retrieved Oct. 31, 2020]

(vi) New Mexico: <https://cvprovider.nmhealth.org/public-dashboard.html#> [Retrieved Oct. 24, 2020]

(vii) North Dakota: <https://www.health.nd.gov/diseases-conditions/coronavirus/north-dakota-coronavirus-cases> [Retrieved October 24, 2020]

(viii) Oregon:

<https://public.tableau.com/app/profile/oregon.health.authority.covid.19/viz/OregonCOVID-19CaseDemographicsandDiseaseSeverityStatewide/DemographicData> [Retrieved Oct. 31, 2020]

(ix) Pennsylvania: <https://experience.arcgis.com/experience/ed2def13f9b045eda9f7d22dbc9b500e>  
[Retrieved Oct. 31, 2020]

(x) South Carolina: <https://scdhec.gov/covid19/south-carolina-county-level-data-covid-19>  
[Retrieved May 15, 2021]

(xi) South Dakota: <https://doh.sd.gov/news/coronavirus.aspx> [Retrieved Oct. 24, 2020]

*Appendix S1, Supplement to: COVID-19 Due to Wild-Type SARS-CoV-2*

(xii) Tennessee: <https://www.tn.gov/content/tn/health/cedep/ncov/data.html> [Retrieved Nov. 12, 2020]

(xiii) Wisconsin: <https://www.dhs.wisconsin.gov/covid-19/cases.htm#by%20age> [Retrieved Oct. 24, 2020]

(xiv) Alabama: <https://bamatracker.com/chart/caseages> [Retrieved Nov. 14, 2020]

(xv) Florida: <https://floridahealthcovid19.gov/> [Retrieved November 13, 2020]

(xvi) Oklahoma: [https://coronavirus.health.ok.gov/sites/g/files/gmc786/f/2020.10.23\\_weekly\\_epi\\_report.pdf](https://coronavirus.health.ok.gov/sites/g/files/gmc786/f/2020.10.23_weekly_epi_report.pdf) [Retrieved Oct. 23, 2020]

(xvii) Rhode Island: <https://ri-department-of-health-covid-19-case-data-rihealth.hub.arcgis.com/#age> [Retrieved October 25, 2020]

(xviii) Minnesota: <https://www.health.state.mn.us/diseases/coronavirus/situation.html#ageg1> [Retrieved Oct. 24, 2020]

(xix) Missouri: <https://health.mo.gov/living/healthcondiseases/communicable/novel-coronavirus/data/public-health/demographics.php> [Retrieved Oct. 24, 2020]

**S1.2. Demographic Data by Age and by State websites:**

(i) Alaska: <https://live.laborstats.alaska.gov/pop/>

<https://demography.dola.colorado.gov/population/data/sya-regions/>

(ii) Colorado: Colorado State Demography Office, Colorado Department of Local Affairs,

<https://demography.dola.colorado.gov/population/data/sya-regions/>

(iii) Michigan: <https://censusreporter.org/profiles/04000US26-michigan/>

(iv) Montana: <https://censusreporter.org/profiles/04000US30-montana/>

(v) Nevada: <https://censusreporter.org/profiles/04000US32-nevada/>

(vi) New Mexico:

[https://censusreporter.org/data/table/?table=B01001&geo\\_ids=04000US35&primary\\_geo\\_id=04000US35](https://censusreporter.org/data/table/?table=B01001&geo_ids=04000US35&primary_geo_id=04000US35)

(vii) North Dakota: <https://censusreporter.org/profiles/04000US38-north-dakota/>

(viii) Oregon: <https://censusreporter.org/profiles/04000US41-oregon/>

(ix) Pennsylvania: <https://censusreporter.org/profiles/04000US42-pennsylvania/>

- (x) South Carolina <https://censusreporter.org/profiles/04000US45-south-carolina/>
- (xi) South Dakota: <https://www.sdstate.edu/sociology-rural-studies/census-data-center/population-change>
- (xii) Tennessee: <https://www.tn.gov/content/dam/tn/health/documents/population/TN-Population-by-AgeGrp-Sex-Race-Ethnicity-2019.pdf>
- (xiii) Wisconsin: <https://censusreporter.org/profiles/04000US55-wisconsin/>
- (xiv) Alabama: <https://censusreporter.org/profiles/04000US01-alabama/>
- (xv) Florida: [http://edr.state.fl.us/Content/populationdemographics/data/Pop\\_Census\\_Day.pdf](http://edr.state.fl.us/Content/populationdemographics/data/Pop_Census_Day.pdf)
- (xvi) Oklahoma: <https://censusreporter.org/profiles/04000US40-oklahoma/>
- (xvii) Rhode Island: <https://censusreporter.org/profiles/04000US44-rhode-island/>
- (xviii) Minnesota: <https://censusreporter.org/profiles/04000US27-minnesota/>
- (xix) Missouri: <https://healthapps.dhss.mo.gov/MoPhims/QueryBuilder?qbc=PNM&q=1&m=1>

**S1.3. New York Times Websites Indicating Surges by State:**

- <https://www.nytimes.com/interactive/2021/us/alaska-covid-cases.html>
- <https://www.nytimes.com/interactive/2021/us/colorado-covid-cases.html>
- <https://www.nytimes.com/interactive/2021/us/michigan-covid-cases.html>
- <https://www.nytimes.com/interactive/2021/us/montana-covid-cases.html>
- <https://www.nytimes.com/interactive/2021/us/nevada-covid-cases.html>
- <https://www.nytimes.com/interactive/2021/us/new-mexico-covid-cases.html>
- <https://www.nytimes.com/interactive/2021/us/north-dakota-covid-cases.html>
- <https://www.nytimes.com/interactive/2021/us/oregon-covid-cases.html>
- <https://www.nytimes.com/interactive/2021/us/pennsylvania-covid-cases.html>
- <https://www.nytimes.com/interactive/2021/us/south-carolina-covid-cases.html>
- <https://www.nytimes.com/interactive/2020/us/south-dakota-coronavirus-cases.html>

<https://www.nytimes.com/interactive/2020/us/tennessee-coronavirus-cases.html>

<https://www.nytimes.com/interactive/2021/us/wisconsin-covid-cases.html>

<https://www.nytimes.com/interactive/2021/us/alabama-covid-cases.html>

<https://www.nytimes.com/interactive/2020/us/florida-coronavirus-cases.html>

<https://www.nytimes.com/interactive/2021/us/oklahoma-covid-cases.html>

<https://www.nytimes.com/interactive/2021/us/rhode-island-covid-cases.html>

<https://www.nytimes.com/interactive/2021/us/minnesota-covid-cases.html>

<https://www.nytimes.com/interactive/2020/us/missouri-coronavirus-cases.html>

Since the data on the websites above are updated on a daily basis, we are including below in S1.4 the tables of the data the way they appeared on the websites when we accessed them. These provide the numbers we used in our calculations.

#### **S1.4. List of Supplemental Tables.**

- 1) Table A. Alaska COVID-19 Cases by Age (as of October 31, 2020)
- 2) Table B. Colorado COVID-19 Cases by Age (as of Oct. 22, 2020)
- 3) Table C. Michigan COVID-19 Cases by Age (as of Nov. 17, 2020)
- 4) Table D. Montana COVID-19 Cases by Age (as of Oct. 23, 2020)
- 5) Table E. Nevada COVID-19 Cases by Age (as of October 30, 2020)
- 6) Table F. New Mexico COVID-19 Cases by Age (as of Oct. 23, 2020)
- 7) Table G. North Dakota COVID-19 Cases by Age (as of October 23, 2020)
- 8) Table H. Oregon COVID-19 Cases by Age (as of October 30, 2020)
- 9) Table I. Pennsylvania COVID-19 Cases by Age (as of October 30, 2020)
- 10) Table J. South Carolina COVID-19 Cases by Age (as of Dec. 5, 2020)
- 11) Table K. South Dakota COVID-19 Cases by Age (as of Oct. 23, 2020)
- 12) Table L. Tennessee COVID-19 Cases by Age (as of November 11, 2020)
- 13) Table M. Wisconsin COVID-19 Cases by Age (as of Oct. 23, 2020)
- 14) Table N. Alabama COVID-19 Cases by Age (as of November 13, 2020)
- 15) Table O. Florida COVID-19 Cases by Age (as of Nov. 12, 2020)

*Appendix S1, Supplement to: COVID-19 Due to Wild-Type SARS-CoV-2*

16) Table P. Oklahoma COVID-19 Cases by Age (as of Oct. 22, 2020)

17) Table Q. Rhode Island COVID-19 Cases by Age (as of October 24, 2020)

18) Table R. Minnesota COVID-19 Cases by Age (as of Oct. 23, 2020)

19) Table S. Missouri COVID-19 Cases by Age (as of Oct. 23, 2020)

Appendix S1, Supplement to: COVID-19 Due to Wild-Type SARS-CoV-2

**Table A. Alaska COVID-19 Cases by Age (as of October 31, 2020)**

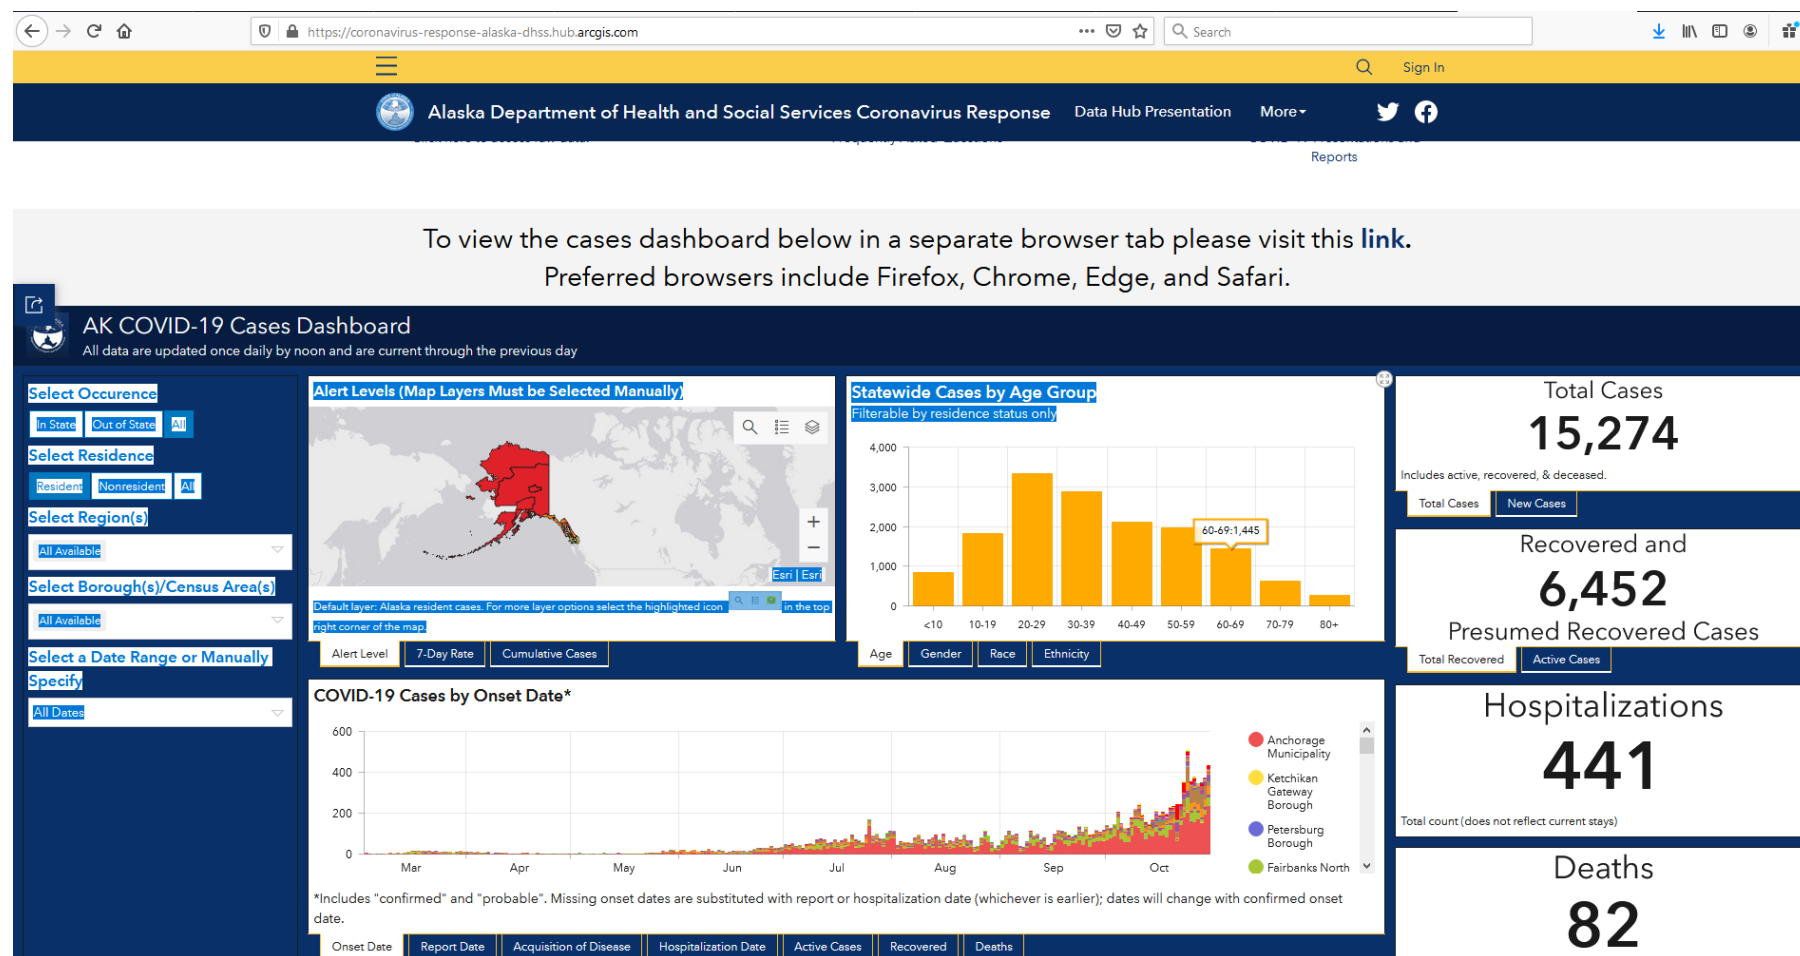

Source: Alaska Department of Health and Social Services Coronavirus Response Hub, AK COVID—19 Cases Dashboard <https://experience.arcgis.com/experience/2d19dc2b5c7e4b399ff6495a8950493d/>

**Table B. Colorado COVID-19 Cases by Age as of 10/22/2020**

| Age   | Proportion of Cases | Total Case Count |
|-------|---------------------|------------------|
| 0-9   | 0.038               | 3480             |
| 10-19 | 0.108               | 9890             |
| 20-29 | 0.223               | 20421            |
| 30-39 | 0.175               | 16025            |
| 40-49 | 0.154               | 14102            |
| 50-59 | 0.133               | 12179            |
| 60-69 | 0.085               | 7784             |
| 70-79 | 0.046               | 4212             |
| 80+   | 0.038               | 3480             |

Total cumulative cases: 91,572

Source: Colorado Department of Public Health and Environment, “CDPHE COVID19 State-Level Expanded Case Data” (as of 10/22/2020)

<https://covid19.colorado.gov/data>

**Table C. Michigan COVID-19 Cases by Age (as of Nov. 17, 2020)**

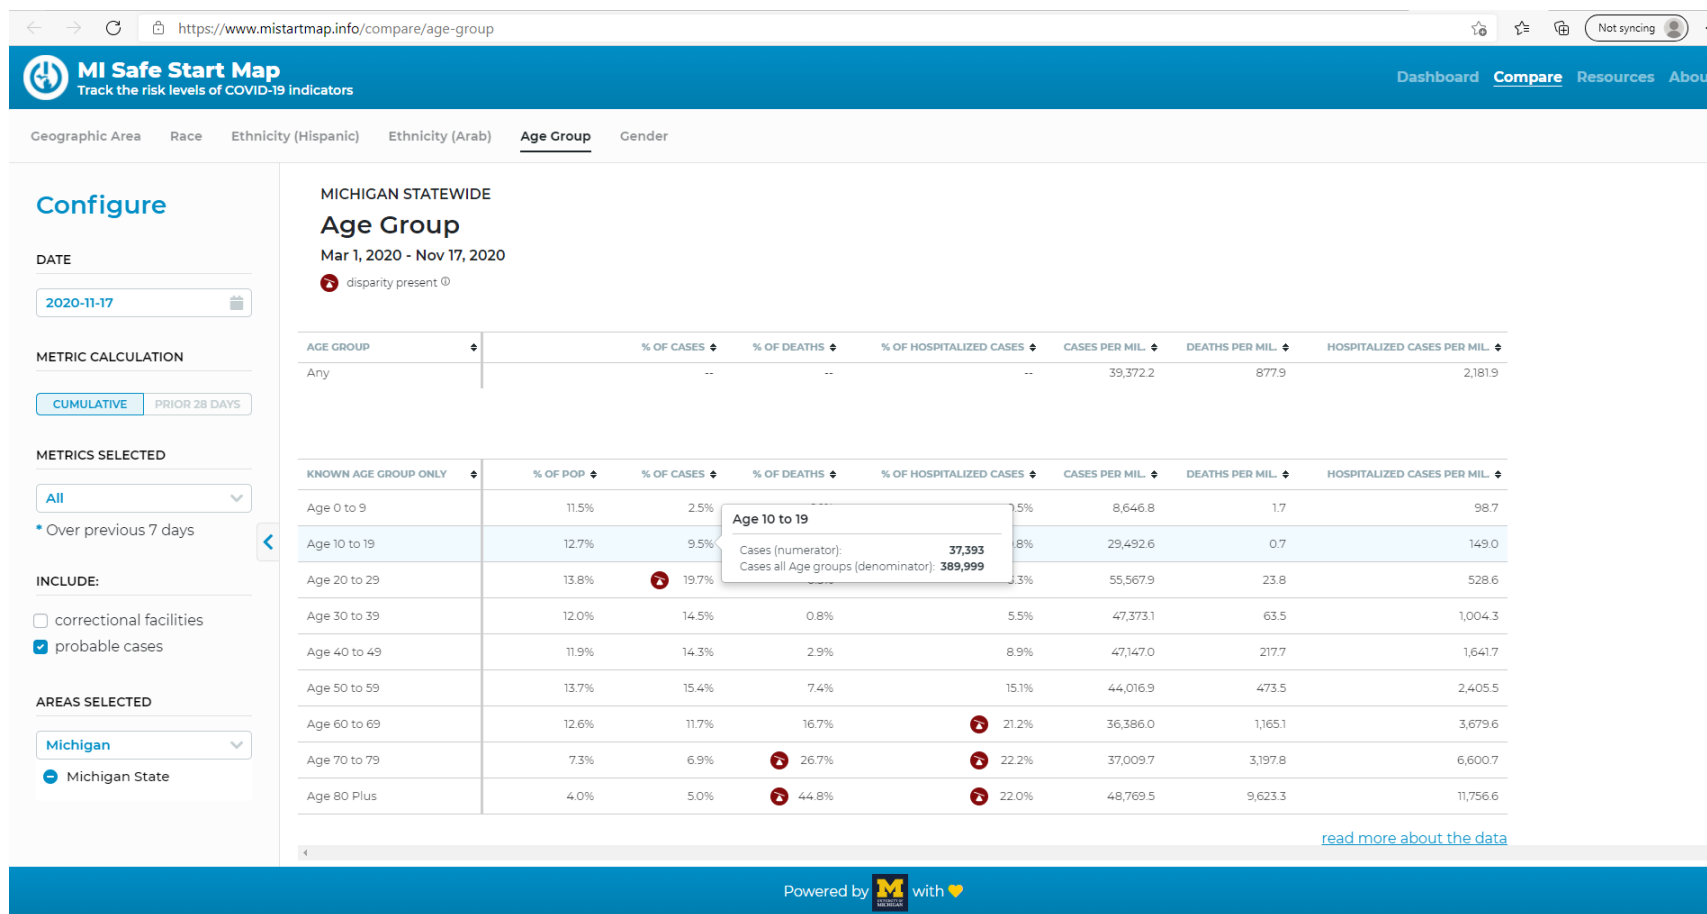

Source: MI Safe Start Map, University of Michigan

<https://www.mistartmap.info/compare/age-group>



**Table D. Montana COVID-19 Cases by Age (as of 10/23/2020)**

| <u>Age Group</u> | <u>Number of Cases</u> (percent of total) |
|------------------|-------------------------------------------|
| 0-9 years        | 1,148 (4%)                                |
| 10-19 years      | 3,001 (11%)                               |
| 20-29 years      | 5,452 (21%)                               |
| 30-39 years      | 4,263 (16%)                               |
| 40-49 years      | 3,514 (13%)                               |
| 50-59 years      | 3,457 (13%)                               |
| 60-69 years      | 2,883 (11%)                               |
| 70-79 years      | 1,714 (6%)                                |
| 80-89 years      | 796 (3%)                                  |
| 90-99 years      | 257 (1%)                                  |
| 100+             | 18 (<1%)                                  |
| Total Cases:     | 26,503                                    |

Source: Montana Department of Public Health and Human Services

<https://dphhs.mt.gov/publichealth/cdepi/diseases/coronavirusmt/demographics>

**Table E. Nevada COVID-19 Cases by Age (as of October 30, 2020)**

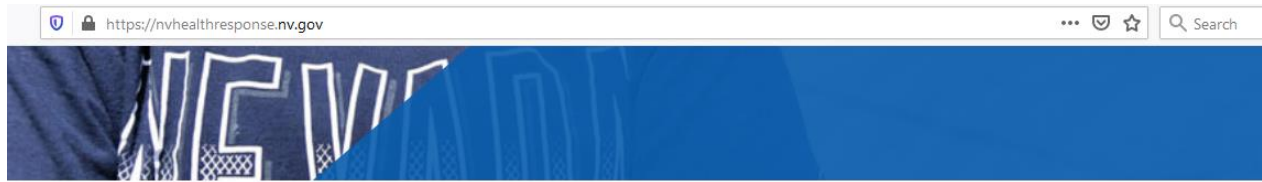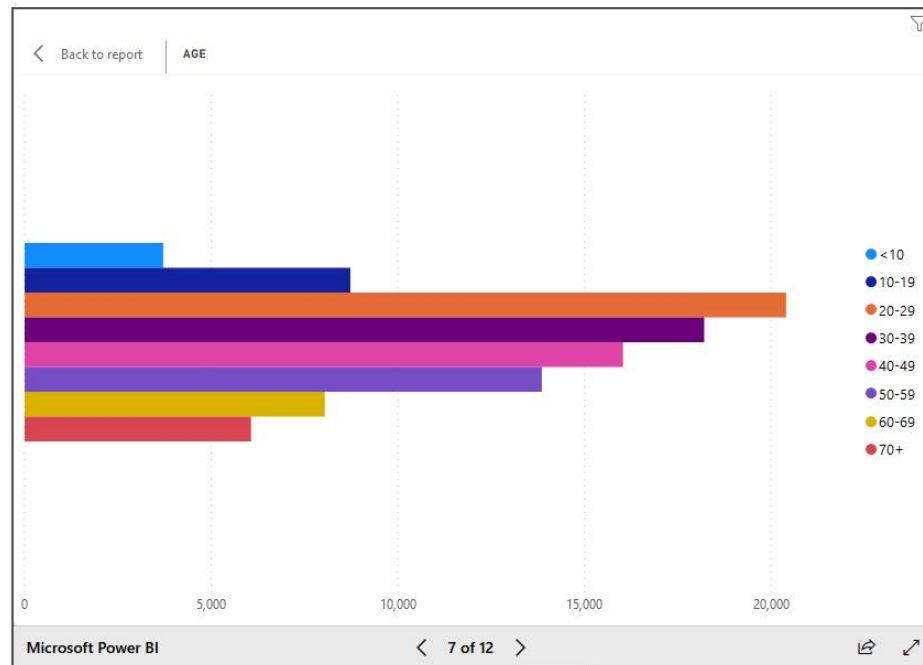

Total cases: 101,235

The comparison of interest is between the 10-19-year-olds (8727 cases) and the older adults (60-69-year-olds: 8042 cases; 70+ year olds: 6065 cases).

Source: Nevada Department of Health  
<https://nvhealthresponse.nv.gov>

**Table F. New Mexico COVID-19 Cases by Age (as of 10/23/2020)**

**Statewide Age Breakdown**

| <b>Age</b> | <b>Number of Cases</b> |
|------------|------------------------|
| 0-9        | 2120                   |
| 10-19      | 4513                   |
| 20-29      | 7987                   |
| 30-39      | 7290                   |
| 40-49      | 6145                   |
| 50-59      | 5339                   |
| 60-69      | 3594                   |
| 70-79      | 1810                   |
| 80-89      | 975                    |
| 90+        | 347                    |
| Total:     | 4012                   |

Source: New Mexico Department of Health  
<https://cvprovider.nmhealth.org/public-dashboard.html#>

**Table G. North Dakota COVID-19 Cases by Age (as of October 23, 2020)**

| Age   | Total Cases |
|-------|-------------|
| 0-9   | 1549        |
| 10-19 | 4658        |
| 20-29 | 8814        |
| 30-39 | 5932        |
| 40-49 | 4486        |
| 50-59 | 4292        |
| 60-69 | 3490        |
| 70-79 | 1859        |
| 80+   | 1794        |
| Total | 35,080      |

Source: North Dakota Department of Health

<https://www.health.nd.gov/diseases-conditions/coronavirus/north-dakota-coronavirus-cases>

**Table H. Oregon COVID-19 Cases by Age (as of October 30, 2020)**

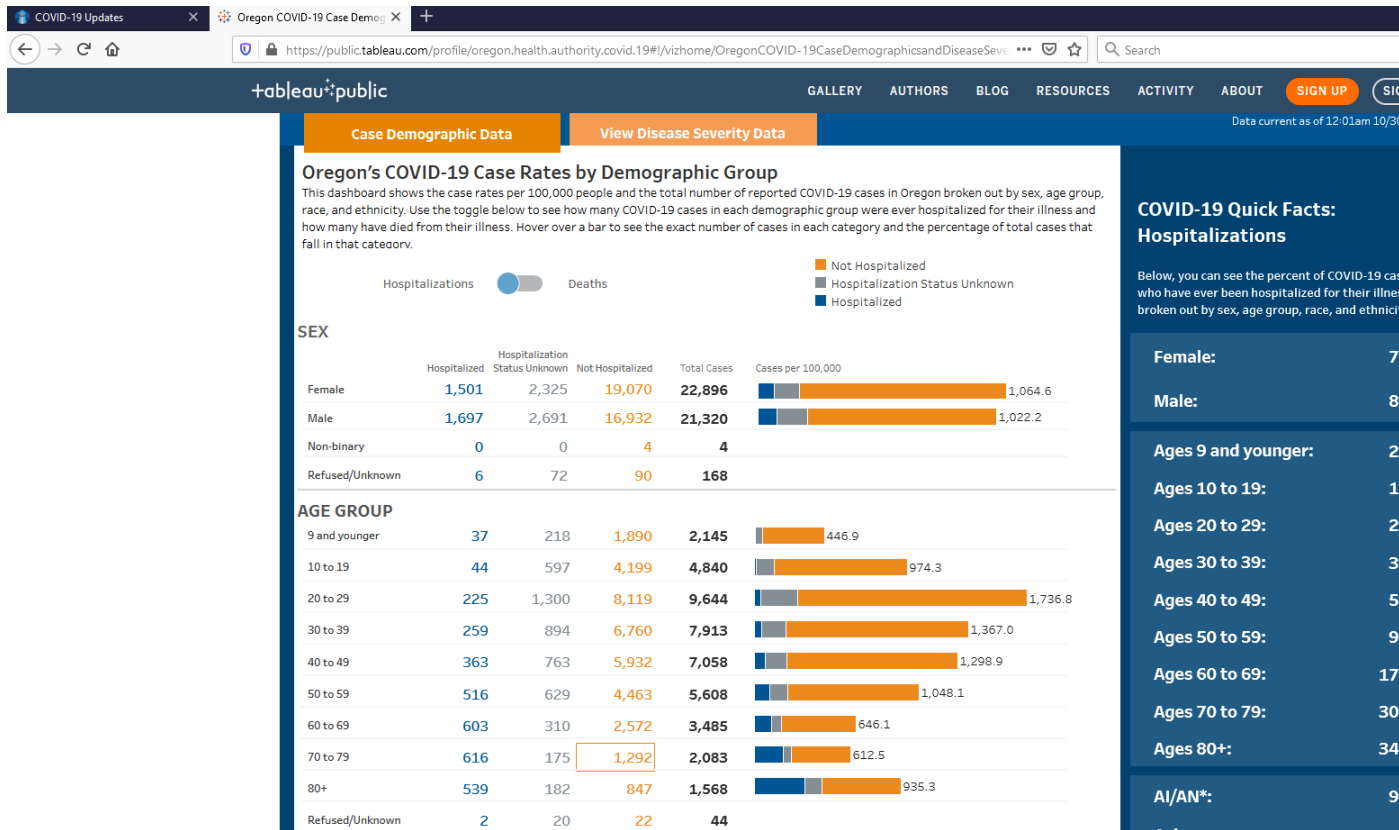

Source: Oregon Health Authority (OHA) and the OHA Public Health Division  
<https://public.tableau.com/app/profile/oregon.health.authority.covid.19/viz/OregonCOVID-19CaseDemographicsandDiseaseSeverityStatewide/DemographicData>

**Table I. Pennsylvania COVID-19 Cases by Age (as of October 30, 2020)**

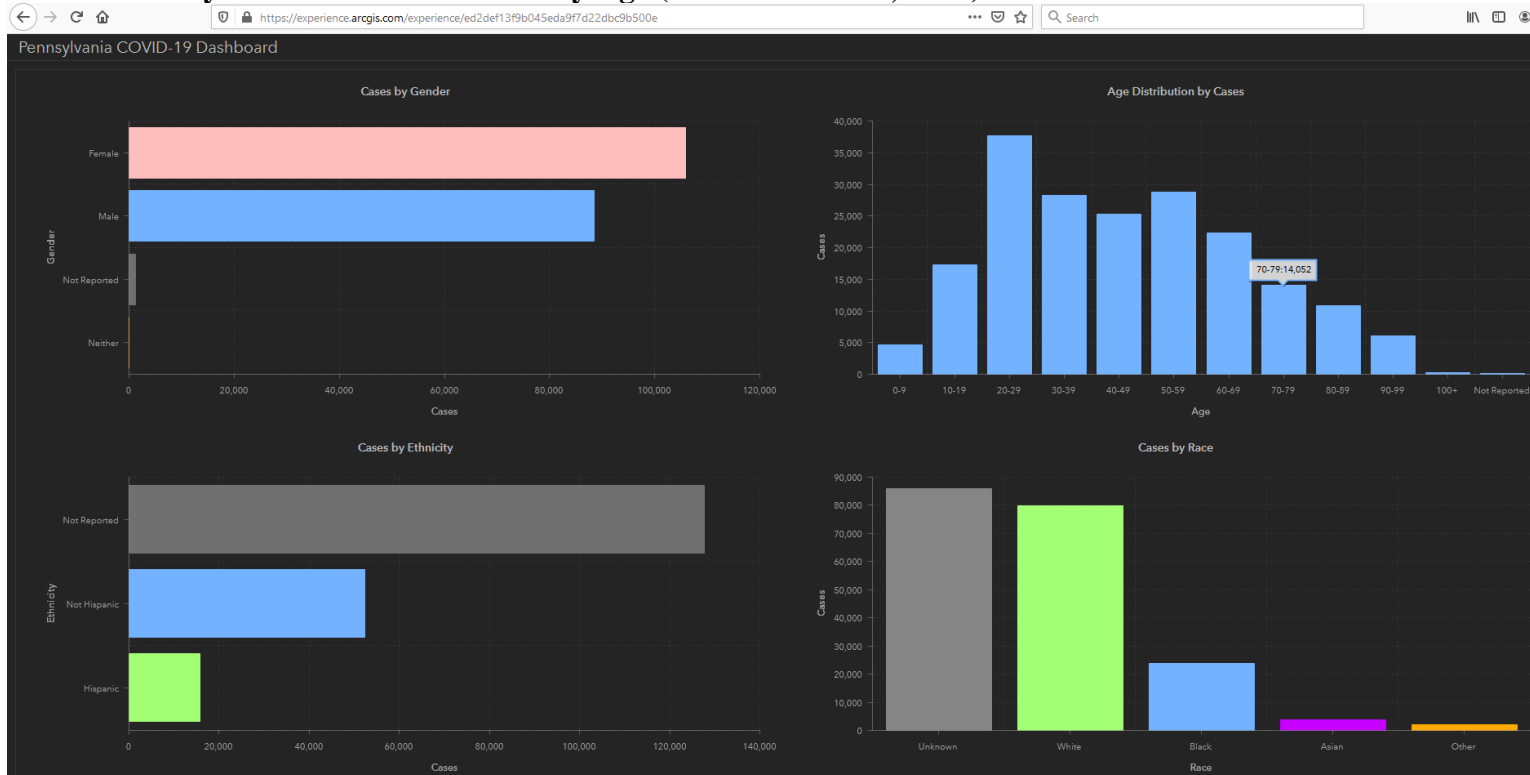

← → ↻ <https://data.pa.gov/Health/COVID-19-Aggregate-Cases-Current-Daily-County-Heal/f72v-r42c/data>

**opendataPA** Commonwealth of Pennsylvania

Home Data Catalog governor.pa.gov COVID-19 Spatial Data Other

COVID-19 Aggregate Cases Current Daily County Health

Based on [COVID-19 Aggregate Cases Current Daily County Health](#)

This dataset contains aggregate COVID-19 case counts and rates by date of first report for all counties in Pennsylvania and for the state as a whole. Counts

| Jurisdiction | Date       | New Cases | 7-day Averag... | Cumulative c... | Population (... | New Case Rate | 7-Day Averag... | Cumulative ... | County FIPS ... | Longitude  | Latitude  | Georeferenc...      |
|--------------|------------|-----------|-----------------|-----------------|-----------------|---------------|-----------------|----------------|-----------------|------------|-----------|---------------------|
| Pennsylvania | 10/30/2020 | 2,691     | 2,226.3         | 209,822         | 12,801,989      | 21            | 17.4            | 1,639          | 42000           | -75.167756 | 39.346129 | POINT (-75.16775... |

Total cases 209,822.

Source: Pennsylvania Department of Health, <https://experience.arcgis.com/experience/ed2def13f9b045eda9f7d22dbc9b500e>

**Table J. South Carolina COVID-19 Cases by Age (as of Dec. 5, 2020)**

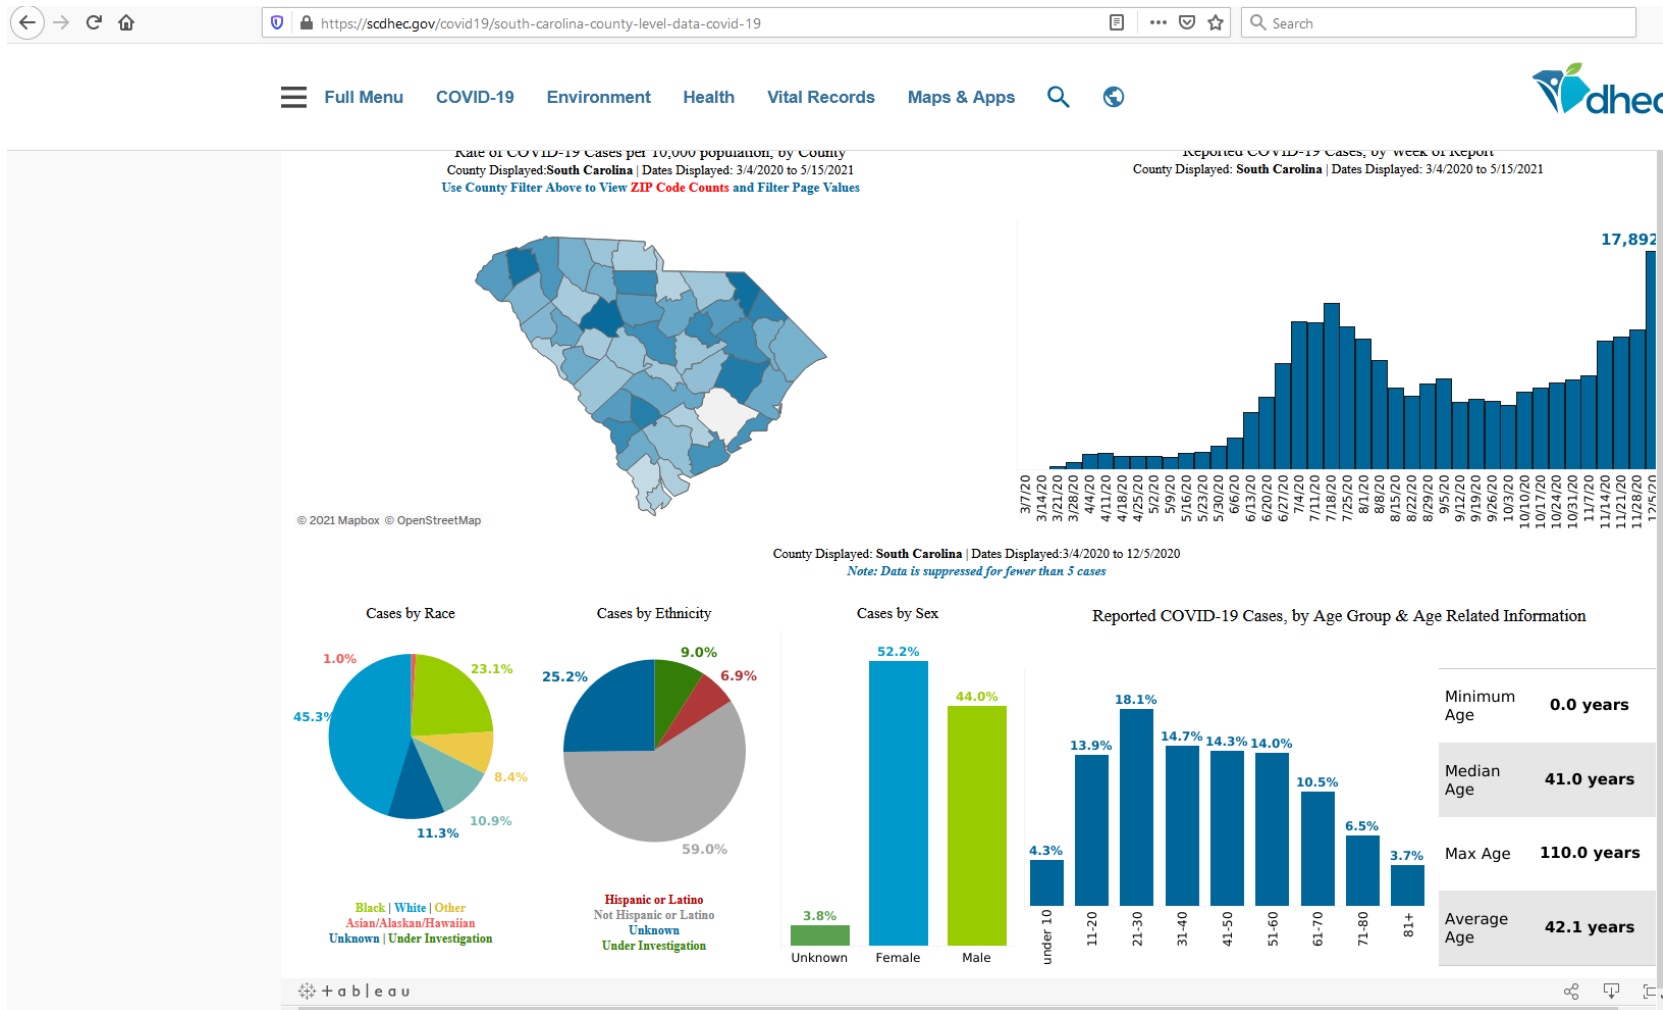

Total cases: 17,892

Source: South Carolina Department of Health and Environmental Control <https://scdhec.gov/covid19/south-carolina-county-level-data-covid-19>

**Table K. South Dakota COVID-19 Cases by Age (as of Oct. 23, 2020)**

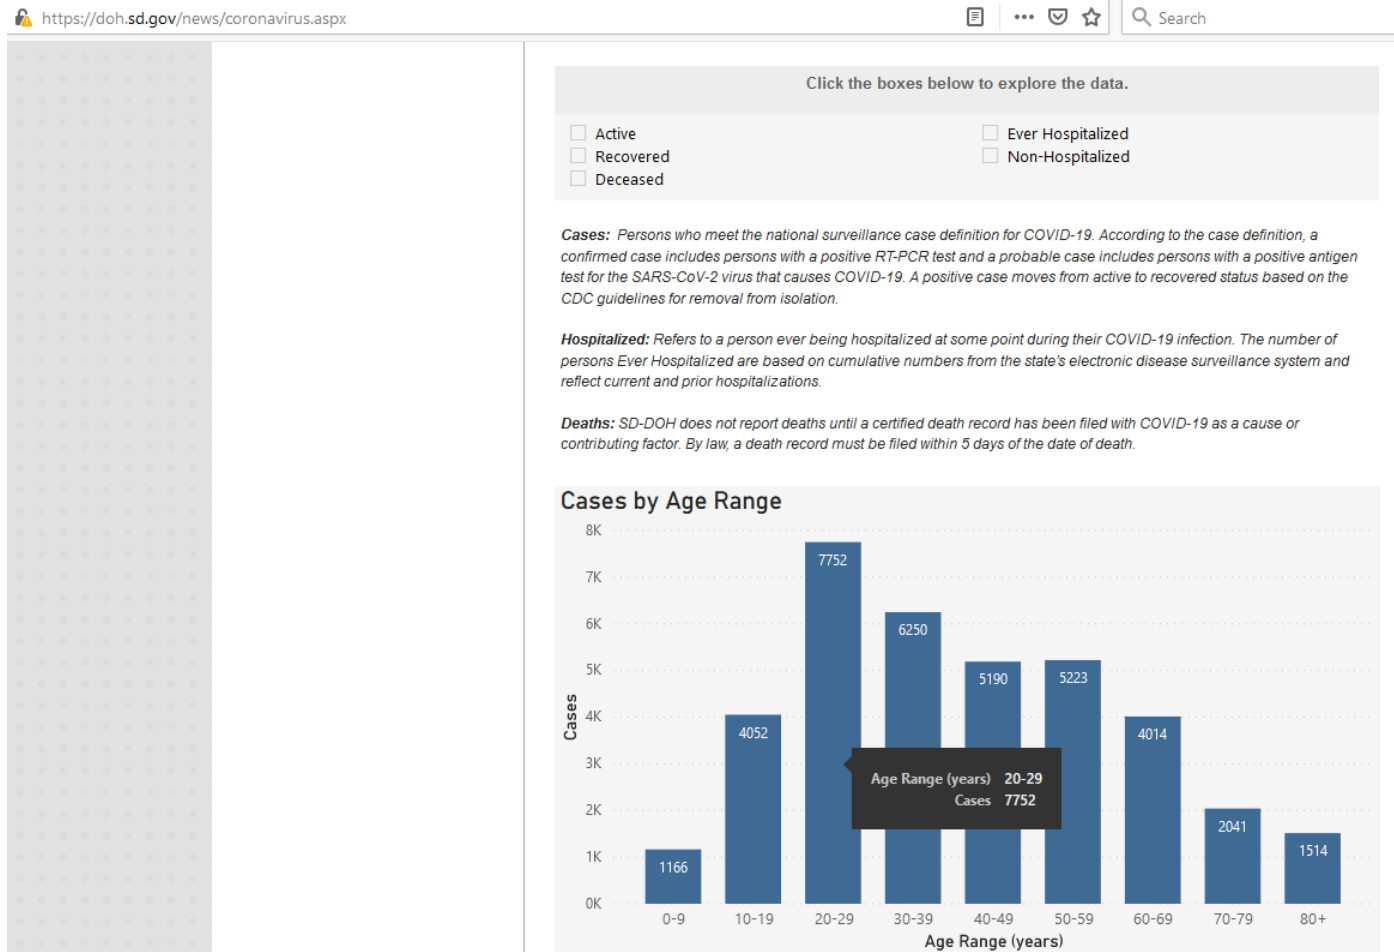

Total cases: 37,262

Source: South Dakota Department of health  
<https://doh.sd.gov/news/coronavirus.aspx>



**Table L. Tennessee COVID-19 Cases by Age (as of November 11, 2020)**

| Age     | Total Cases |
|---------|-------------|
| 0-10    | 14,363      |
| 11-20   | 38,925      |
| 21-30   | 57,829      |
| 31-40   | 46,794      |
| 41-50   | 43,426      |
| 51-60   | 39,243      |
| 61-70   | 27,287      |
| 71-80   | 16,316      |
| 81+     | 8,801       |
| Pending | 397         |
| Total   | 293,381     |

Source: Tennessee Department of Health, “Age Dataset” in <https://www.tn.gov/health/cedep/ncov/data/downloadable-datasets.html>

**Table M. Wisconsin COVID-19 Cases by Age (as of Oct. 23, 2020)**

Percent of confirmed COVID-19 cases by age group

Updated: 10/23/2020 (Total: 190,478)

- View cases by:
- Age group (years)
  - Gender
  - Race
  - Ethnicity
  - Region
- Select case confirmation status:
- Confirmed
  - Probable
  - Confirmed and probable

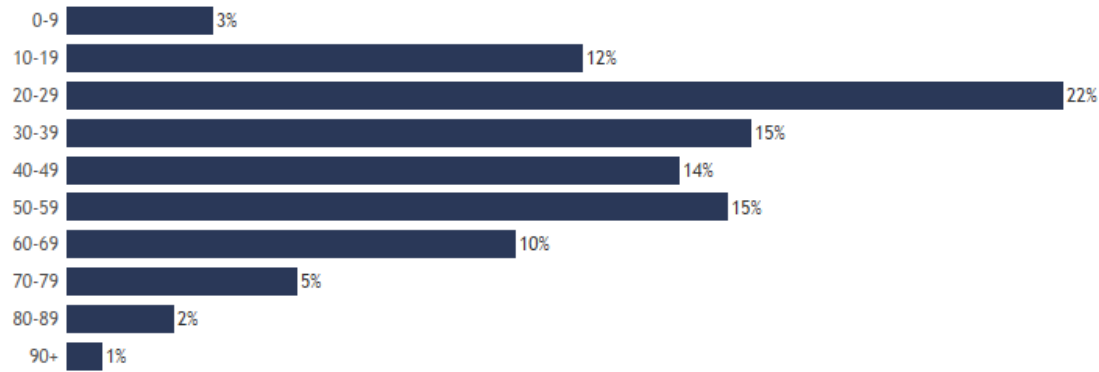

Source: Wisconsin Department of Health Services  
<https://www.dhs.wisconsin.gov/covid-19/cases.htm#by%20age>

**Table N. Alabama COVID-19 Cases by Age (as of November 13, 2020)**

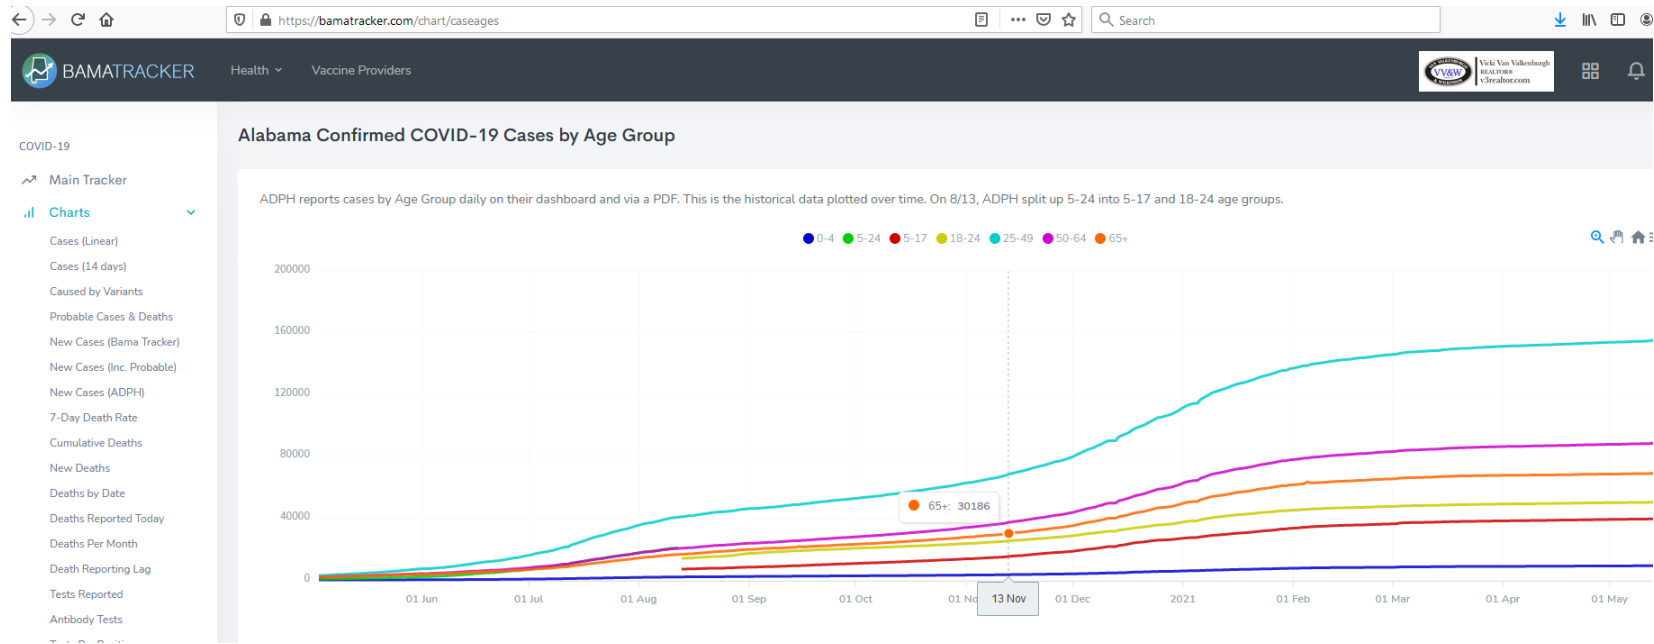

| Age   | Cumulative Cases |
|-------|------------------|
| 0-4   | 3,519            |
| 5-17  | 15,316           |
| 18-24 | 25,413           |
| 25-49 | 68,497           |
| 50-64 | 37,344           |
| 65+   | 30,186           |

Source: Alabama Department of Public Health COVID-19 Dashboard Hub  
<https://bamatracker.com/chart/caseages>

Table O. Florida COVID-19 Cases by Age (as of Nov. 12, 2020)

## COVID-19: characteristics of 858,585 Florida resident cases

Data through Nov 12, 2020 verified as of Nov 13, 2020 at 09:25 AM

Data in this report are provisional and subject to change.

| Age group    | Cases          | Hospitalizations | Deaths        | Gender       | Cases          |
|--------------|----------------|------------------|---------------|--------------|----------------|
| 0-4 years    | 14,429   2%    | 336   1%         | 0   0%        | Female       | 441,752   51%  |
| 5-14 years   | 39,056   5%    | 310   1%         | 5   0%        | Male         | 412,389   48%  |
| 15-24 years  | 140,515   16%  | 1,376   3%       | 32   0%       | Unknown      | 4,444   1%     |
| 25-34 years  | 156,421   18%  | 2,870   6%       | 101   1%      | <b>Total</b> | <b>858,585</b> |
| 35-44 years  | 135,609   16%  | 4,282   8%       | 302   2%      |              |                |
| 45-54 years  | 133,416   16%  | 6,404   12%      | 714   4%      |              |                |
| 55-64 years  | 111,472   13%  | 9,001   17%      | 1,920   11%   |              |                |
| 65-74 years  | 67,147   8%    | 10,310   20%     | 3,726   21%   |              |                |
| 75-84 years  | 38,283   4%    | 9,751   19%      | 5,096   29%   |              |                |
| 85+ years    | 21,217   2%    | 6,895   13%      | 5,549   32%   |              |                |
| Unknown      | 1,020   0%     | 7   0%           | 0   0%        |              |                |
| <b>Total</b> | <b>858,585</b> | <b>51,542</b>    | <b>17,445</b> |              |                |

| Ethnicity    | Cases          | Hospitalizations | Deaths        |
|--------------|----------------|------------------|---------------|
| Hispanic     | 254,865   30%  | 14,431   28%     | 4,418   25%   |
| Non-Hispanic | 384,010   45%  | 34,293   67%     | 11,754   67%  |
| Unknown      | 219,710   26%  | 2,818   5%       | 1,273   7%    |
| <b>Total</b> | <b>858,585</b> | <b>51,542</b>    | <b>17,445</b> |

| Race and ethnicity | Cases          | Hospitalizations | Deaths        |
|--------------------|----------------|------------------|---------------|
| White              | 418,331   49%  | 31,824   62%     | 12,233   70%  |
| Hispanic           | 168,168   20%  | 10,125   20%     | 3,513   20%   |
| Non-Hispanic       | 223,614   26%  | 20,647   40%     | 8,124   47%   |
| Unknown            | 26,549   3%    | 1,052   2%       | 596   3%      |
| Black              | 125,921   15%  | 11,771   23%     | 3,245   19%   |
| Hispanic           | 6,239   1%     | 493   1%         | 128   1%      |
| Non-Hispanic       | 109,768   13%  | 10,963   21%     | 2,990   17%   |
| Unknown            | 9,914   1%     | 315   1%         | 127   1%      |
| Other race         | 117,325   14%  | 6,293   12%      | 1,384   8%    |
| Hispanic           | 59,750   7%    | 3,460   7%       | 658   4%      |
| Non-Hispanic       | 40,638   5%    | 2,526   5%       | 592   3%      |
| Unknown            | 16,937   2%    | 307   1%         | 134   1%      |
| Unknown race       | 197,008   23%  | 1,654   3%       | 583   3%      |
| Hispanic           | 20,708   2%    | 353   1%         | 119   1%      |
| Non-Hispanic       | 9,990   1%     | 157   0%         | 48   0%       |
| Unknown            | 166,310   19%  | 1,144   2%       | 416   2%      |
| <b>Total</b>       | <b>858,585</b> | <b>51,542</b>    | <b>17,445</b> |

**Hospitalization** counts include anyone who was hospitalized at some point during their illness. It does not reflect the number of people currently hospitalized. **Other race** includes any person with a race of American Indian/Alaskan native, Asian, native Hawaiian/Pacific Islander, or other.

Source: Florida Department of Health, <https://Floridahealthcovid19.gov/>

**Table P. Oklahoma COVID-19 Cases by Age (as of Oct. 22, 2020)**

[https://coronavirus.health.ok.gov/sites/g/files/gmc786/f/2020.10.23\\_weekly\\_epi\\_report.pdf](https://coronavirus.health.ok.gov/sites/g/files/gmc786/f/2020.10.23_weekly_epi_report.pdf)

Automatic Zoom

**DEMOGRAPHIC INFORMATION as of October 22, 2020**

|                                  | Cases count (%) <sup>1</sup> |        | Deaths count (%) <sup>1</sup> |        | Cumulative Incidence Rate <sup>2</sup> | Cumulative Mortality Rate <sup>2</sup> |
|----------------------------------|------------------------------|--------|-------------------------------|--------|----------------------------------------|----------------------------------------|
| <b>Oklahoma</b>                  | <b>112,483</b>               |        | <b>1221</b>                   |        | <b>2,852.7</b>                         | <b>31.0</b>                            |
| <b>Gender</b>                    |                              |        |                               |        |                                        |                                        |
| Male                             | 53,835                       | (47.9) | 680                           | (55.7) | 2,756.5                                | 34.8                                   |
| Female                           | 58,648                       | (52.1) | 541                           | (44.3) | 2,947.1                                | 27.2                                   |
| <b>Age group</b>                 |                              |        |                               |        |                                        |                                        |
| Under 1- 4                       | 2,126                        | (1.9)  | 0                             | (0.0)  | 816.3                                  | 0.0                                    |
| 5-14                             | 6,392                        | (5.7)  | 1                             | (0.1)  | 1,188.3                                | 0.2                                    |
| 15-24                            | 22,499                       | (20.0) | 2                             | (0.2)  | 4,183.3                                | 0.4                                    |
| 25-34                            | 19,221                       | (17.1) | 11                            | (0.9)  | 3,538.4                                | 2.0                                    |
| 35-44                            | 17,855                       | (15.9) | 19                            | (1.6)  | 3,641.0                                | 3.9                                    |
| 45-54                            | 15,456                       | (13.7) | 56                            | (4.6)  | 3,357.7                                | 12.2                                   |
| 55-64                            | 13,080                       | (11.6) | 150                           | (12.3) | 2,650.8                                | 30.4                                   |
| 65-74                            | 8,698                        | (7.7)  | 324                           | (26.5) | 2,425.2                                | 90.3                                   |
| 75-84                            | 4,771                        | (4.2)  | 333                           | (27.3) | 2,541.7                                | 177.4                                  |
| 85+                              | 2,384                        | (2.1)  | 325                           | (26.6) | 3,257.0                                | 444.0                                  |
| Unknown                          | 1                            | (0.0)  |                               |        |                                        |                                        |
| <b>Race</b>                      |                              |        |                               |        |                                        |                                        |
| American Indian or Alaska Native | 11,056                       | (9.8)  | 113                           | (9.3)  | 3,599.2                                | 36.8                                   |
| Asian or Pacific Islander        | 3,229                        | (2.9)  | 25                            | (2.0)  | 3,646.4                                | 28.2                                   |
| Black or African American        | 7,734                        | (6.9)  | 76                            | (6.2)  | 2,688.4                                | 26.4                                   |
| Multiracial/Other                | 4,435                        | (3.9)  | 38                            | (3.1)  | 1,071.9                                | 9.2                                    |
| White                            | 65,252                       | (58.0) | 879                           | (72.0) | 2,292.8                                | 30.9                                   |
| Unknown                          | 20,777                       | (18.5) | 90                            | (7.4)  |                                        |                                        |
| <b>Ethnicity</b>                 |                              |        |                               |        |                                        |                                        |
| Hispanic or Latino               | 17,450                       | (15.5) | 78                            | (6.4)  | 4,066.9                                | 18.2                                   |
| Not Hispanic or Latino           | 71,241                       | (63.3) | 994                           | (81.4) | 2,027.3                                | 28.3                                   |
| Unknown                          | 23,792                       | (21.2) | 149                           | (12.2) |                                        |                                        |

1. Percentages may not add up to 100 due to rounding.  
2. Rate per 100,000 population

COVID-19 Weekly Epidemiology Report / October 16 – October 22, 2020 / Updated October 22, 2020

Page 11 of 23

Source: Oklahoma State Department of Health

[https://coronavirus.health.ok.gov/sites/g/files/gmc786/f/2020.10.23\\_weekly\\_epi\\_report.pdf](https://coronavirus.health.ok.gov/sites/g/files/gmc786/f/2020.10.23_weekly_epi_report.pdf)

**Table Q. Rhode Island COVID-19 Cases by Age (as of October 24, 2020)**

| Age   | Cumulative Cases |
|-------|------------------|
| 0-4   | 480              |
| 5-9   | 531              |
| 10-14 | 656              |
| 15-18 | 1174             |
| 19-24 | 3522             |
| 25-29 | 2655             |
| 30-39 | 4658             |
| 40-49 | 4125             |
| 50-59 | 4175             |
| 60-69 | 2880             |
| 70-79 | 1773             |
| 80+   | 2364             |

Total cases 28,993

Source: Rhode Island Department of Health (RIDOH) Salesforce COVID-19 Case Dataset  
<https://ri-department-of-health-covid-19-case-data-rihealth.hub.arcgis.com/#age>

**Table R. Minnesota COVID-19 Cases by Age (as of Oct. 23, 2020)**

| <b>Age Group</b>       | <b>Number of Cases</b> |
|------------------------|------------------------|
| <b>0-4 years</b>       | 2,536                  |
| <b>5-9 years</b>       | 2,624                  |
| <b>10-14 years</b>     | 3,988                  |
| <b>15-19 years</b>     | 11,769                 |
| <b>20-24 years</b>     | 16,429                 |
| <b>25-29 years</b>     | 12,611                 |
| <b>30-34 years</b>     | 11,466                 |
| <b>35-39 years</b>     | 10,447                 |
| <b>40-44 years</b>     | 9,371                  |
| <b>45-49 years</b>     | 8,916                  |
| <b>50-54 years</b>     | 8,893                  |
| <b>55-59 years</b>     | 8,242                  |
| <b>60-64 years</b>     | 6,536                  |
| <b>65-69 years</b>     | 4,415                  |
| <b>70-74 years</b>     | 3,393                  |
| <b>75-79 years</b>     | 2,561                  |
| <b>80-84 years</b>     | 2,066                  |
| <b>85-89 years</b>     | 1,754                  |
| <b>90-94 years</b>     | 1,209                  |
| <b>95-99 years</b>     | 524                    |
| <b>100+ years</b>      | 95                     |
| <b>Unknown/missing</b> | 18                     |
| <b>Total</b>           | <b>129,863</b>         |

Source: <https://www.health.state.mn.us/diseases/coronavirus/situation.html#ageg1>

**Table S. Missouri COVID-19 Cases by Age (as of Oct. 23, 2020)**

| <b>Age</b> | <b>Number of Cases</b> |
|------------|------------------------|
| 0-9        | 3054                   |
| 10-19      | 13637                  |
| 20         | 3596                   |
| 21         | 3512                   |
| 22         | 2831                   |
| 23         | 2655                   |
| 24         | 2403                   |
| 25         | 2316                   |
| 26         | 2260                   |
| 27         | 2243                   |
| 28         | 2181                   |
| 29         | 2114                   |
| 30         | 2006                   |
| 31         | 1942                   |
| 32         | 1893                   |
| 33         | 1762                   |
| 34         | 1769                   |
| 35         | 1761                   |
| 36         | 1659                   |
| 37         | 1761                   |
| 38         | 1736                   |
| 39         | 1761                   |
| 40         | 1752                   |
| 41         | 1554                   |
| 42         | 1589                   |
| 43         | 1659                   |
| 44         | 1579                   |
| 45         | 1654                   |
| 46         | 1556                   |
| 47         | 1620                   |
| 48         | 1678                   |
| 49         | 1783                   |
| 50         | 1686                   |
| 51         | 1704                   |
| 52         | 1616                   |



| <b>Age</b>           | <b>Number of Cases</b> |
|----------------------|------------------------|
| 53                   | 1619                   |
| 54                   | 1579                   |
| 55                   | 1655                   |
| 56                   | 1633                   |
| 57                   | 1677                   |
| 58                   | 1619                   |
| 59                   | 1608                   |
| 60                   | 1519                   |
| 61                   | 1477                   |
| 62                   | 1361                   |
| 63                   | 1394                   |
| 64                   | 1308                   |
| 65                   | 1188                   |
| 66                   | 1100                   |
| 67                   | 1028                   |
| 68                   | 1031                   |
| 69                   | 976                    |
| 70                   | 950                    |
| 71                   | 886                    |
| 72                   | 908                    |
| 73                   | 844                    |
| 74                   | 731                    |
| 75                   | 707                    |
| 76                   | 679                    |
| 77                   | 746                    |
| 78                   | 627                    |
| 79                   | 574                    |
| 80-84                | 2410                   |
| 85-89                | 1918                   |
| 90+                  | 1975                   |
| Unknown              | 289                    |
| Total cases: 120,298 |                        |

Source: Missouri Department of Health and Senior Services

<https://health.mo.gov/living/healthcondiseases/communicable/novel-coronavirus/cases-by-age.php>
